# Supplementary material for: Relation of atherogenic lipoproteins with estimated glomerular filtration rate decline: a longitudinal study
Source: Springer Nature journal article supplement (doi:10.1186/s12882-015-0122-5), 2015-08-03
Supplement: MOESM2 [file 9741760]

## Additional File 2

|                 | <b>Lp(a)</b> | <b>apoC-III</b> | <b>TG</b> | <b>LDL-C</b> |
|-----------------|--------------|-----------------|-----------|--------------|
| <b>Lp(a)</b>    | 1.00         |                 |           |              |
| <b>apoC-III</b> | 0.01*        | 1.00            |           |              |
| <b>TG</b>       | -0.03        | 0.56            | 1.00      |              |
| <b>LDL-C</b>    | 0.21         | 0.23            | 0.16      | 1.00         |

Correlation matrix of lipoproteins and lipid fractions examined. All correlations with  $p < 0.001$  except if indicated by \*.

Abbreviations: Lp(a) lipoprotein(a), apoC-III apolipoprotein C-III, TG triglycerides, LDL-C low density lipoprotein cholesterol, apoB apolipoprotein B.
